# Supplementary material for: The IgG4 hinge with CD28 transmembrane domain improves VHH-based CAR T cells targeting a membrane-distal epitope of GPC1 in pancreatic cancer
Source: PubMed Central journal article supplement (PMC10082787; doi:10.1038/s41467-023-37616-4), 2023-04-08
Supplement: 41467_2023_37616_MOESM1_ESM.pdf [file 41467_2023_37616_MOESM1_ESM.pdf]

**Supplementary Table 1: Protein production yield of anti-GPC1 mouse monoclonal antibodies.**

| <b>Antibody</b>              | HM1  | HM2  | HM3 | HM4 | HM5 | HM6 |
|------------------------------|------|------|-----|-----|-----|-----|
| <b>Concentration (µg/ml)</b> | 12.3 | 22.3 | 7.4 | 7.6 | 4.1 | 7.8 |

**Supplementary Table 2: The amino acid sequence of the GPC1 peptides. Each peptide is 18 amino acids long and has 9 overlapped amino acids with adjacent peptides.**

| Name       | Sequence            | Name       | Sequence            |
|------------|---------------------|------------|---------------------|
| peptide 1  | DPASKSRSCGEVRQIYGA  | peptide 29 | LKGCLANQADLDAEWRNL  |
| peptide 2  | GEVRQIYGAKGFSLSDVP  | peptide 30 | DLDAEWRNLLDSMVLITD  |
| peptide 3  | KGFSLSDVPQAEISGEHL  | peptide 31 | LDSMVLITDKFWGTSGVE  |
| peptide 4  | QAEISGEHLRICPQGYTC  | peptide 32 | KFWGTSGVESVIGSVHTW  |
| peptide 5  | RICPQGYTCCTSEMEENL  | peptide 33 | SVIGSVHTWLAEAINALQ  |
| peptide 6  | CTSEMEENLANRSHAELE  | peptide 34 | LAEAINALQDNRDTLTAK  |
| peptide 7  | ANRSHAELETALRDSSRV  | peptide 35 | DNRDTLTAKVIQGCGNPK  |
| peptide 8  | TALRDSSRVLQAMLATQL  | peptide 36 | VIQGCGNPKVNPQGPPE   |
| peptide 9  | LQAMLATQLRSFDDHFQH  | peptide 37 | VNPQGPPEEKRRRGKLA   |
| peptide 10 | RSFDDHFQHLLNDSERTL  | peptide 38 | EKRRRGKLAPRERPPSGT  |
| peptide 11 | LLNDSERTLQATFGAFG   | peptide 39 | PRERPPSGTLEKLVSEAK  |
| peptide 12 | QATFGAFGELYTQNARA   | peptide 40 | LEKLVSEAKAQLRDVQDF  |
| peptide 13 | ELYTQNARAFRDLYSELR  | peptide 41 | AQLRDVQDFWISLPGTLC  |
| peptide 14 | FRDLYSELRLYYRGANLH  | peptide 42 | WISLPGTLCSEKMALSTA  |
| peptide 15 | LYYRGANLHLEETLAEFW  | peptide 43 | SEKMALSTASDDRCWNGM  |
| peptide 16 | LEETLAEFWARLLERLFK  | peptide 44 | SDDRCWNGMARGRYLPEV  |
| peptide 17 | ARLLERLFKQLHPQLLLP  | peptide 45 | ARGRYLPEVMGDGLANQI  |
| peptide 18 | QLHPQLLLPDDYLDCLGK  | peptide 46 | MGDGLANQINNPEVEVDI  |
| peptide 19 | DDYLDCLGKQAEALRPFQ  | peptide 47 | NNPEVEVDITKPDMTIRQ  |
| peptide 20 | QAEALRPFGEAPRELRLR  | peptide 48 | TKPDMTIRQQIMQLKIMT  |
| peptide 21 | EAPRELRLRATRAFVAAR  | peptide 49 | QIMQLKIMTNRLRSAYNG  |
| peptide 22 | ATRAFVAARSFVQGLGVA  | peptide 50 | NRLRSAYNGNDVDFQDAS  |
| peptide 23 | SFVQGLGVASDVVRKVAQ  | peptide 51 | NDVDFQDASDDGSGSGSG  |
| peptide 24 | SDVVRKVAQVPLGPECSR  | peptide 52 | DDGSGSGSGDGCLDDLCS  |
| peptide 25 | VPLGPECSRRAVMKLVYCA | peptide 53 | DGCLDDLCSRKVSRSKSSS |
| peptide 26 | AVMKLVYCAHCLGVPGAR  | peptide 54 | RKVSRSKSSSRTPLTHAL  |
| peptide 27 | HCLGVPGARPCPDYCRNV  | peptide 55 | SRTPLTHALPGLSEQEGQ  |

|            |                    |            |                  |
|------------|--------------------|------------|------------------|
| peptide 28 | PCPDYCRNVLKGCLANQA | peptide 56 | PGLSEQEGQK TSAAS |
|------------|--------------------|------------|------------------|

**Supplementary Table 3: The detailed information of each tissue specimen in Supplementary Figure 4.**

| Position | Pathology                       | Stage | TNM    | Type      |
|----------|---------------------------------|-------|--------|-----------|
| A1       | Duct adenocarcinoma             | I     | T2N0M0 | Malignant |
| A2       | Duct adenocarcinoma             | I     | T2N0M0 | Malignant |
| A3       | Duct adenocarcinoma<br>(sparse) | II    | T3N0M0 | Malignant |
| A4       | Duct adenocarcinoma             | III   | T3N1M0 | Malignant |
| A5       | Duct adenocarcinoma             | II    | T3N0M0 | Malignant |
| A6       | Duct adenocarcinoma             | I     | T2N0M0 | Malignant |
| A7       | Duct adenocarcinoma             | II    | T3N0M0 | Malignant |
| A8       | Duct adenocarcinoma<br>(sparse) | II    | T3N0M0 | Malignant |
| A9       | Duct adenocarcinoma             | IV    | T3N0M1 | Malignant |
| A10      | Duct adenocarcinoma             | III   | T2N1M0 | Malignant |
| B1       | Duct adenocarcinoma             | II    | T3N0M0 | Malignant |
| B2       | Duct adenocarcinoma             | II    | T3N0M0 | Malignant |
| B3       | Duct adenocarcinoma             | II    | T3N0M0 | Malignant |
| B4       | Duct adenocarcinoma             | II    | T3N0M0 | Malignant |
| B5       | Duct adenocarcinoma             | II    | T3N0M0 | Malignant |
| B6       | Duct adenocarcinoma             | I     | T2N0M0 | Malignant |
| B7       | Duct adenocarcinoma<br>(sparse) | II    | T3N0M0 | Malignant |
| B8       | Duct adenocarcinoma             | I     | T2N0M0 | Malignant |
| B9       | Duct adenocarcinoma             | II    | T2N0M0 | Malignant |
| B10      | Duct adenocarcinoma             | I     | T2N0M0 | Malignant |
| C1       | Duct adenocarcinoma             | II    | T3N0M0 | Malignant |
| C2       | Duct adenocarcinoma             | II    | T3N0M0 | Malignant |
| C3       | Duct adenocarcinoma             | II    | T3N0M0 | Malignant |
| C4       | Duct adenocarcinoma<br>(sparse) | II    | T3N0M0 | Malignant |
| C5       | Duct adenocarcinoma             | II    | T3N0M0 | Malignant |
| C6       | Duct adenocarcinoma             | II    | T3N0M0 | Malignant |
| C7       | Duct adenocarcinoma             | II    | T3N0M0 | Malignant |
| C8       | Duct adenocarcinoma             | II    | T3N0M0 | Malignant |
| C9       | Duct adenocarcinoma<br>(sparse) | III   | T2N1M0 | Malignant |
| C10      | Duct adenocarcinoma             | II    | T3N0M0 | Malignant |
| D1       | Duct adenocarcinoma             | III   | T4N1M0 | Malignant |
| D2       | Duct adenocarcinoma             | I     | T2N0M0 | Malignant |
| D3       | Duct adenocarcinoma             | I     | T2N0M0 | Malignant |

|     |                                    |     |         |           |
|-----|------------------------------------|-----|---------|-----------|
| D4  | Duct adenocarcinoma<br>(sparse)    | II  | T3N0M0  | Malignant |
| D5  | Duct adenocarcinoma                | I   | T2N0M0  | Malignant |
| D6  | Duct adenocarcinoma                | I   | T1N0M0  | Malignant |
| D7  | Duct adenocarcinoma                | III | T3N1M0  | Malignant |
| D8  | Duct adenocarcinoma                | III | T3N1M0  | Malignant |
| D9  | Duct adenocarcinoma                | III | T2N1bM0 | Malignant |
| D10 | Duct adenocarcinoma                | II  | T3N0M0  | Malignant |
| E1  | Duct adenocarcinoma                | III | T3N1M0  | Malignant |
| E2  | Duct adenocarcinoma                | I   | T2N0M0  | Malignant |
| E3  | Duct adenocarcinoma                | I   | T2N0M0  | Malignant |
| E4  | Duct adenocarcinoma                | II  | T3N0M0  | Malignant |
| E5  | Duct adenocarcinoma                | II  | T3N0M0  | Malignant |
| E6  | Duct adenocarcinoma                | I   | T2N0M0  | Malignant |
| E7  | Duct adenocarcinoma                | I   | T2N0M0  | Malignant |
| E8  | Duct adenocarcinoma                | II  | T3N0M0  | Malignant |
| E9  | Duct adenocarcinoma                | I   | T2N0M0  | Malignant |
| E10 | Duct adenocarcinoma                | III | T2N1M0  | Malignant |
| F1  | Duct adenocarcinoma                | II  | T3N0M0  | Malignant |
| F2  | Duct adenocarcinoma<br>(sparse)    | I   | T2N0M0  | Malignant |
| F3  | Duct adenocarcinoma                | III | T2N1M0  | Malignant |
| F4  | Duct adenocarcinoma                | II  | T3N0M0  | Malignant |
| F5  | Duct adenocarcinoma                | II  | T3N0M0  | Malignant |
| F6  | Duct adenocarcinoma                | IV  | T3N0M1  | Malignant |
| F7  | Duct adenocarcinoma                | II  | T3N0M0  | Malignant |
| F8  | Duct adenocarcinoma                | II  | T3N0M0  | Malignant |
| F9  | Acinic cell carcinoma              | I   | T2N0M0  | Malignant |
| F10 | Squamous cell<br>carcinoma         | II  | T3N0M0  | Malignant |
| G1  | Adjacent normal<br>pancreas tissue | -   | -       | NAT       |
| G2  | Adjacent normal<br>pancreas tissue | -   | -       | NAT       |
| G3  | Adjacent normal<br>pancreas tissue | -   | -       | NAT       |
| G4  | Adjacent normal<br>pancreas tissue | -   | -       | NAT       |
| G5  | Adjacent normal<br>pancreas tissue | -   | -       | NAT       |
| G6  | Adjacent normal<br>pancreas tissue | -   | -       | NAT       |
| G7  | Pancreas tissue                    | -   | -       | Normal    |
| G8  | Pancreas tissue                    | -   | -       | Normal    |

|     |                 |   |   |        |
|-----|-----------------|---|---|--------|
| G9  | Pancreas tissue | - | - | Normal |
| G10 | Pancreas tissue | - | - | Normal |

**Supplementary Table 4: The amino acid sequences of HM2 scFv and D4 V<sub>H</sub>H.**

| Name                   | Sequence                                                                                                                                                                                                                                                                     | Patent Application    |
|------------------------|------------------------------------------------------------------------------------------------------------------------------------------------------------------------------------------------------------------------------------------------------------------------------|-----------------------|
| HM2<br>scFv            | EVQLQQSGAELVRPGASVKLSCTASGFNIKDDYMHWVKQR<br>PEQGLEWIGWIDPENGDT EYASKFQGKATITADTSSNTAYLQ<br>LSSLTSED TAVYYCTRSSVGYWGQGTTLTVSSGGGGSGGGG<br>SGGGGSDVVM TQTPLSLPVS LGDQASISCRSSQSLVHSNGNT<br>YLHWYLQKPGQSPKLLIYK VSNRFSGVPDRFSGSGSGTYFTL<br>KISRVEAEDLG VYFCSQRTHVPYTFGGG TKLEIK | PCT/US2020/<br>013739 |
| D4<br>V <sub>H</sub> H | QVQLVESGGGLVQP GGSRLRSCVASGYSYSIGYMAWFRQAP<br>GKERAWVASRYTGDGGAVFDDAVKGRFTTSQESAGNTFDL<br>QMDSLKPEDTAMYYCAAKGPGFGRWEYWG RGTQVTVSS                                                                                                                                            | PCT/US2020/<br>013739 |

**Supplementary Table 5: Protein sequences of CD8 hinge and IgG4 hinge.**

| <b>Hinge</b>  | <b>Sequence</b>                               |
|---------------|-----------------------------------------------|
| CD8           | TTTPAPRPPTPAPTIASQPLSLRPEACRPAAGGAVHTRGLDFACD |
| Modified IgG4 | ESKYGPPCPPCP                                  |



**Supplementary Table 6: List of genes that are significantly enriched in low and high polyfunctionality subsets of CD8+ D4-IgG4H-CD28<sup>TM</sup> CAR T cells. The DESeq2, an R library, was used for the differential expression analysis test.**

| <b>Gene</b>     | <b>Base mean</b> | <b>Log2 fold change</b> | <b>P value</b> | <b>Functional cluster</b> | <b>Major function</b>                                 |
|-----------------|------------------|-------------------------|----------------|---------------------------|-------------------------------------------------------|
| <i>GSTP1</i>    | 0.883            | -0.929                  | 0.040          | high                      | ↓TNF-a; ↑anti-apoptosis                               |
| <i>ID1</i>      | 0.830            | -0.933                  | 0.036          | high                      | ↑cell growth                                          |
| <i>MTF2</i>     | 0.977            | -0.917                  | 0.043          | high                      | ↑chromatin regulator, DNA-binding                     |
| <i>CD63</i>     | 0.953            | -1.237                  | 0.006          | high                      | ↑cell survival                                        |
| <i>EIF3E</i>    | 0.809            | -0.888                  | 0.045          | high                      | ↑protein synthesis                                    |
| <i>HMGB1</i>    | 2.576            | -1.180                  | 0.005          | high                      | ↑immune response                                      |
| <i>TPR</i>      | 1.278            | -1.036                  | 0.022          | high                      | ↑cell cycle/division                                  |
| <i>COX7A2</i>   | 0.991            | -1.059                  | 0.019          | high                      | ↑oxidative phosphorylation                            |
| <i>PSAT1</i>    | 0.792            | -1.001                  | 0.025          | high                      | ↑amino-acid biosynthesis                              |
| <i>ISG20</i>    | 1.356            | -0.996                  | 0.027          | high                      | ↑cytokine signaling in immune system                  |
| <i>EPRS1</i>    | 0.942            | -0.934                  | 0.039          | high                      | ↑protein synthesis and translation regulation         |
| <i>POMP</i>     | 1.259            | -0.919                  | 0.042          | high                      | ↑proteasome assembly and maturation                   |
| <i>RPS28</i>    | 5.002            | -0.858                  | 0.009          | high                      | ↑ribosomal protein                                    |
| <i>SQSTM1</i>   | 0.610            | 0.939                   | 0.036          | low                       | immune system process; Interleukin-1 signaling        |
| <i>RBM39</i>    | 2.685            | 0.714                   | 0.041          | low                       | mRNA splicing major pathway                           |
| <i>CI9orf53</i> | 0.505            | 0.914                   | 0.041          | low                       | unknown                                               |
| <i>TRBC2</i>    | 4.969            | 0.561                   | 0.041          | low                       | antigen and immunoglobulin binding                    |
| <i>TSTD1</i>    | 0.636            | 0.887                   | 0.049          | low                       | ↑enables thiosulfate-thiol sulfurtransferase activity |
| <i>INPP5DD</i>  | 0.585            | 0.966                   | 0.028          | low                       | negative regulation of immune response                |

**Supplementary Table 7: Reactome pathway analysis of genes that are significantly enriched in low and high polyfunctionality subsets of CD8<sup>+</sup> D4-IgG4H-CD28<sup>TM</sup> CAR T cells.** A hypergeometric distribution test, which is corrected for false discovery rate using the Benjamani-Hochberg method, was performed in this study.

| <b>Gene Pathway</b>                                                                                    | <b>P value</b> | <b>Genes</b>                            |
|--------------------------------------------------------------------------------------------------------|----------------|-----------------------------------------|
| Translation                                                                                            | 0.003          | <i>SPCS2; RPS28; EPRS1; EIF3E</i>       |
| Formation of the ternary complex, and subsequently, the 43S complex                                    | 0.004          | <i>RPS28; EIF3E</i>                     |
| NGF-stimulated transcription                                                                           | 0.005          | <i>IDI</i>                              |
| Translation initiation complex formation                                                               | 0.006          | <i>RPS28; EIF3E</i>                     |
| Ribosomal scanning and start codon recognition                                                         | 0.006          | <i>RPS28; EIF3E</i>                     |
| Activation of the mRNA upon binding of the cap-binding complex and eIFs, and subsequent binding to 43S | 0.007          | <i>RPS28; EIF3E</i>                     |
| Signaling by ALK fusions and activated point mutants                                                   | 0.007          | <i>TPR; SQSTM1</i>                      |
| Signaling by ALK in cancer                                                                             | 0.007          | <i>TPR; SQSTM1</i>                      |
| Nuclear Events (kinase and transcription factor activation)                                            | 0.009          | <i>IDI</i>                              |
| Cytokine Signaling in Immune system                                                                    | 0.012          | <i>ISG20; INPP5D; TPR; HMGB1;SQSTM1</i> |
| Formation of a pool of free 40S subunits                                                               | 0.016          | <i>RPS28; EIF3E</i>                     |
| Interleukin-1 signaling                                                                                | 0.017          | <i>HMGB1; SQSTM1</i>                    |
| SRP-dependent co-translational protein targeting to membrane                                           | 0.020          | <i>SPCS2; RPS28</i>                     |
| GTP hydrolysis and joining of the 60S ribosomal subunit                                                | 0.020          | <i>RPS28; EIF3E</i>                     |
| L13a-mediated translational silencing of Ceruloplasmin expression                                      | 0.020          | <i>RPS28; EIF3E</i>                     |

|                                                                                              |       |                                                              |
|----------------------------------------------------------------------------------------------|-------|--------------------------------------------------------------|
| Cap-dependent Translation Initiation                                                         | 0.023 | <i>RPS28; EIF3E</i>                                          |
| Eukaryotic Translation Initiation                                                            | 0.023 | <i>RPS28; EIF3E</i>                                          |
| Pexophagy                                                                                    | 0.023 | <i>SQSTM1</i>                                                |
| Apoptosis induced DNA fragmentation                                                          | 0.023 | <i>HMGB1</i>                                                 |
| PECAM1 interactions                                                                          | 0.025 | <i>INPP5D</i>                                                |
| NF-kB is activated and signals survival                                                      | 0.027 | <i>SQSTM1</i>                                                |
| Platelet degranulation                                                                       | 0.027 | <i>CD63; TTN</i>                                             |
| Signaling by NTRK1 (TRKA)                                                                    | 0.028 | <i>IDI</i>                                                   |
| Advanced glycosylation endproduct receptor signaling                                         | 0.029 | <i>HMGB1</i>                                                 |
| p75NTR recruits signaling complexes                                                          | 0.029 | <i>SQSTM1</i>                                                |
| Response to elevated platelet cytosolic Ca <sup>2+</sup>                                     | 0.030 | <i>CD63; TTN</i>                                             |
| Metabolism of amino acids and derivatives                                                    | 0.031 | <i>RPS28; TSTD1; EPRS1; PSAT1</i>                            |
| NRIF signals cell death from the nucleus                                                     | 0.032 | <i>SQSTM1</i>                                                |
| p75NTR signals via NF-kB                                                                     | 0.034 | <i>SQSTM1</i>                                                |
| Interferon Signaling                                                                         | 0.034 | <i>ISG20; TPR</i>                                            |
| Signaling by NTRKs                                                                           | 0.037 | <i>IDI</i>                                                   |
| Interleukin-1 family signaling                                                               | 0.037 | <i>HMGB1; SQSTM1</i>                                         |
| PINK1-PRKN Mediated Mitophagy                                                                | 0.039 | <i>SQSTM1</i>                                                |
| Sulfide oxidation to sulfate                                                                 | 0.039 | <i>TSTD1</i>                                                 |
| Synthesis, secretion, and inactivation of Glucose-dependent Insulinotropic Polypeptide (GIP) | 0.039 | <i>SPCS2</i>                                                 |
| Influenza Viral RNA Transcription and Replication                                            | 0.041 | <i>RPS28; TPR</i>                                            |
| Immune System                                                                                | 0.042 | <i>ISG20; CD63; TSTD1; GSTP1; INPP5D; TPR; HMGB1; SQSTM1</i> |

|                                                  |       |                     |
|--------------------------------------------------|-------|---------------------|
| Selenoamino acid metabolism                      | 0.042 | <i>RPS28; EPRS1</i> |
| tRNA processing                                  | 0.043 | <i>EPRS1; TPR</i>   |
| Serine biosynthesis                              | 0.045 | <i>PSAT1</i>        |
| Interferon alpha/beta signaling                  | 0.045 | <i>ISG20</i>        |
| MyD88 deficiency (TLR2/4)                        | 0.046 | <i>HMGB1</i>        |
| Synthesis, secretion, and deacylation of Ghrelin | 0.046 | <i>SPCS2</i>        |
| IRAK4 deficiency (TLR2/4)                        | 0.048 | <i>HMGB1</i>        |

**Supplementary Table 8: Sequences of primers used for GPC1 and  $\beta$ -actin amplifications.**

| Name                         | Sequence (5' to 3')    |
|------------------------------|------------------------|
| Human GPC1-forward           | GCAGCGTGCACACGTGGCTG   |
| Human GPC1-reverse           | CTGGCCCTTACAGTAGCCAGGC |
| Human $\beta$ -actin-forward | CACCATTGGCAATGAGCGGTTC |
| Human $\beta$ -actin-reverse | AGGTCTTTGCGGATGTCCACGT |

**Supplementary Table 9: Sequences of sgRNAs used for GPC1 KO generation.**

| sgRNA   | Sequence (5'-3')     |
|---------|----------------------|
| sgRNA 1 | CCTCTCCCGCGGCCGCCTAG |
| sgRNA 2 | GAGCGAGCGTTCGGACCTCG |

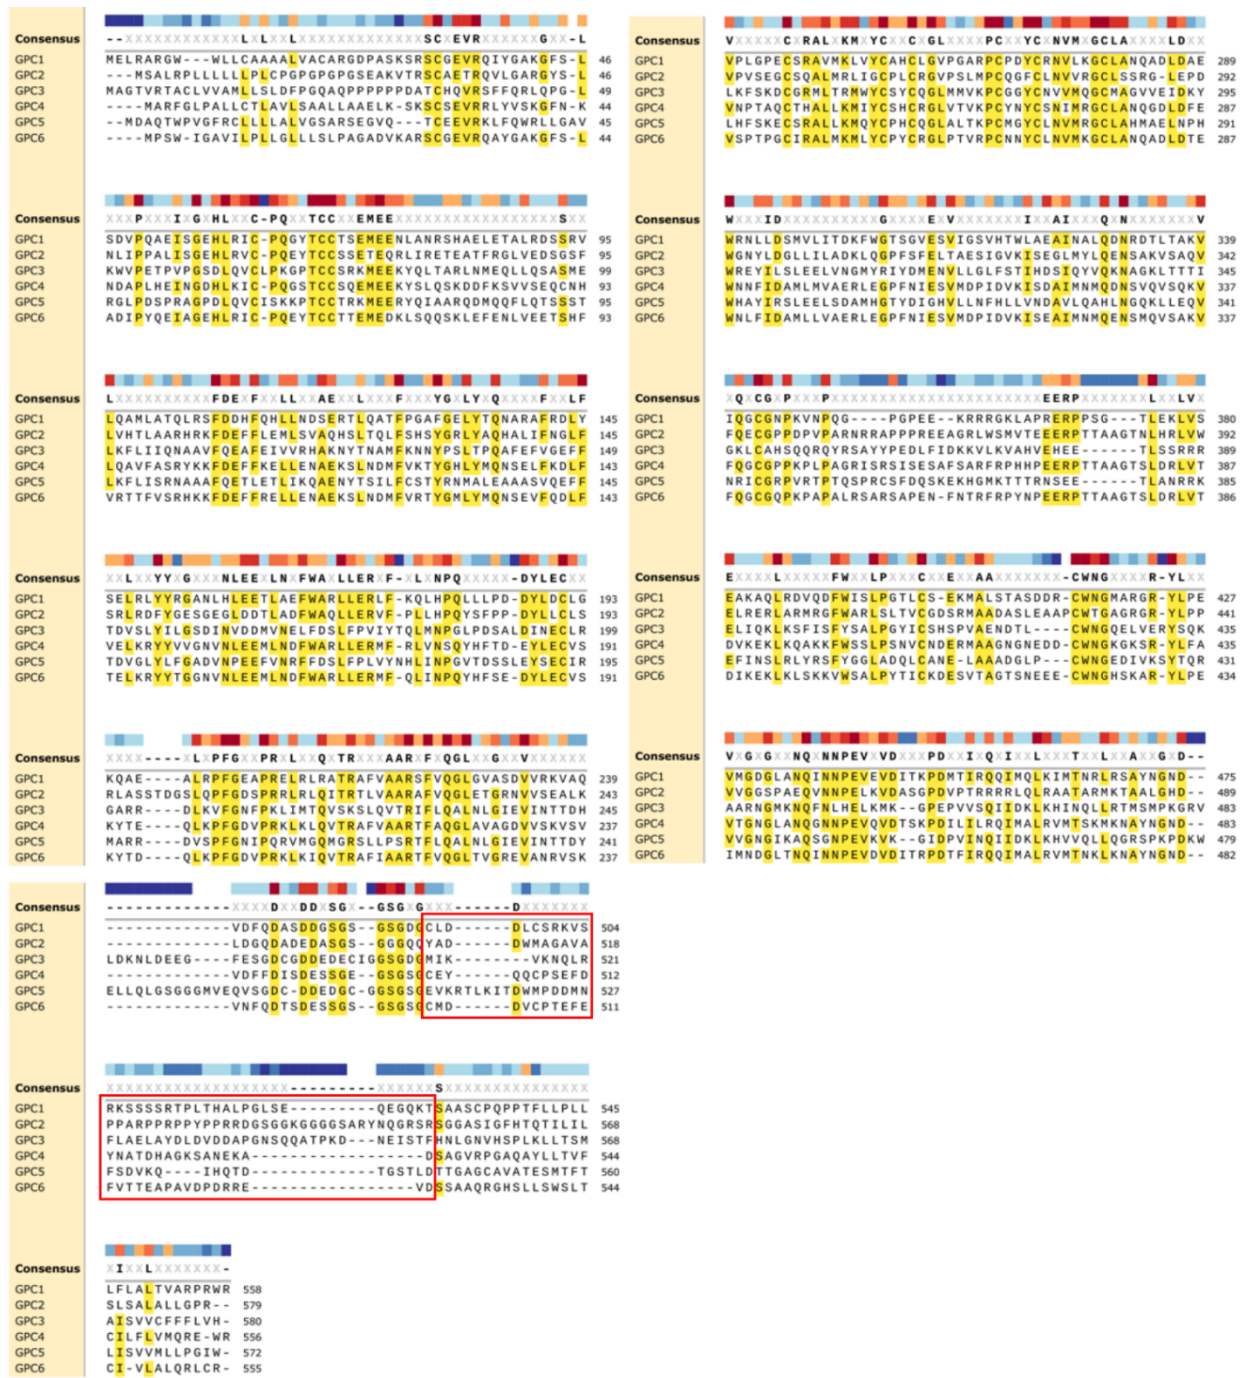

**Supplementary Fig. 1: Alignment of human glypican amino acid sequences.** The alignment was performed using MUSCLE. Amino acids that matched are marked with yellow highlighting. The C-terminal regions of glypicans are highlighted in red boxes.

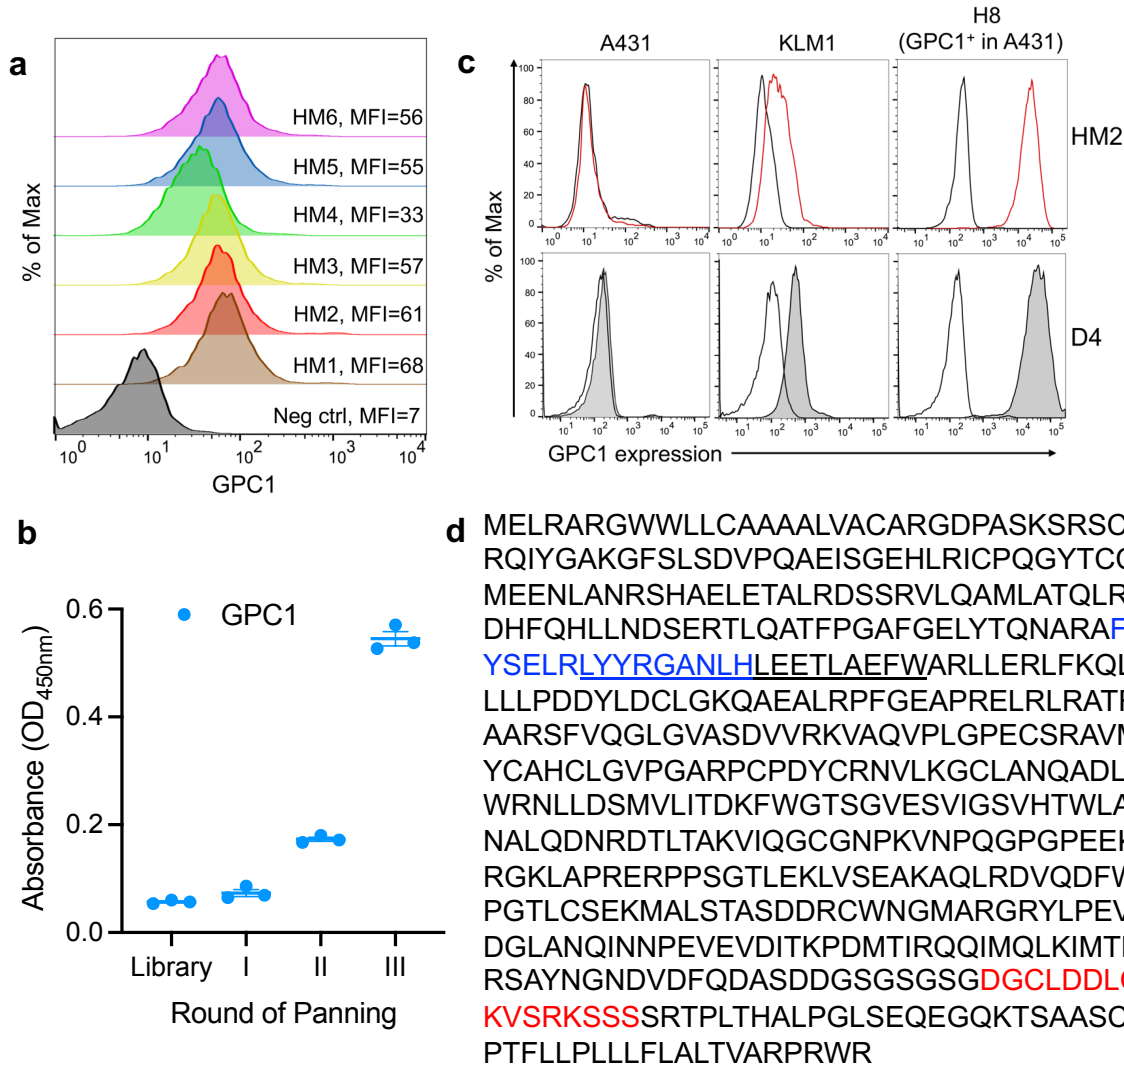

**Supplementary Fig. 2: Isolation of GPC1-specific antibodies and characterization of their binding epitopes.** **a**, Flow cytometry comparing 6 mouse mAb at 10  $\mu$ g/ml showed all increased binding to GPC1-positive T3M4 pancreatic cancer cells compared with non-specific control IgG.  $n = 1$  independent experiment. **b**, GPC1 protein was used for panning on camel nanobody phage displayed library. Polyclonal phage ELISA from the output phage of each round of panning.  $n = 3$  independent experiments. **c**, Binding abilities of HM2 and D4 to GPC1 expressed on cell surface. H8 is a GPC1-overexpressing A431 cell line. KLM1 is a pancreatic cancer cell line. **d**, GPC1 amino acid sequence and the epitopes of HM2 and D4. D4 reacted with two peptides including peptide 14 (blue colored) and peptide 15 (underlined). HM2 reacted with peptide 53 (red colored). Values represent mean  $\pm$  SEM. Source data are provided as a Source Data file.



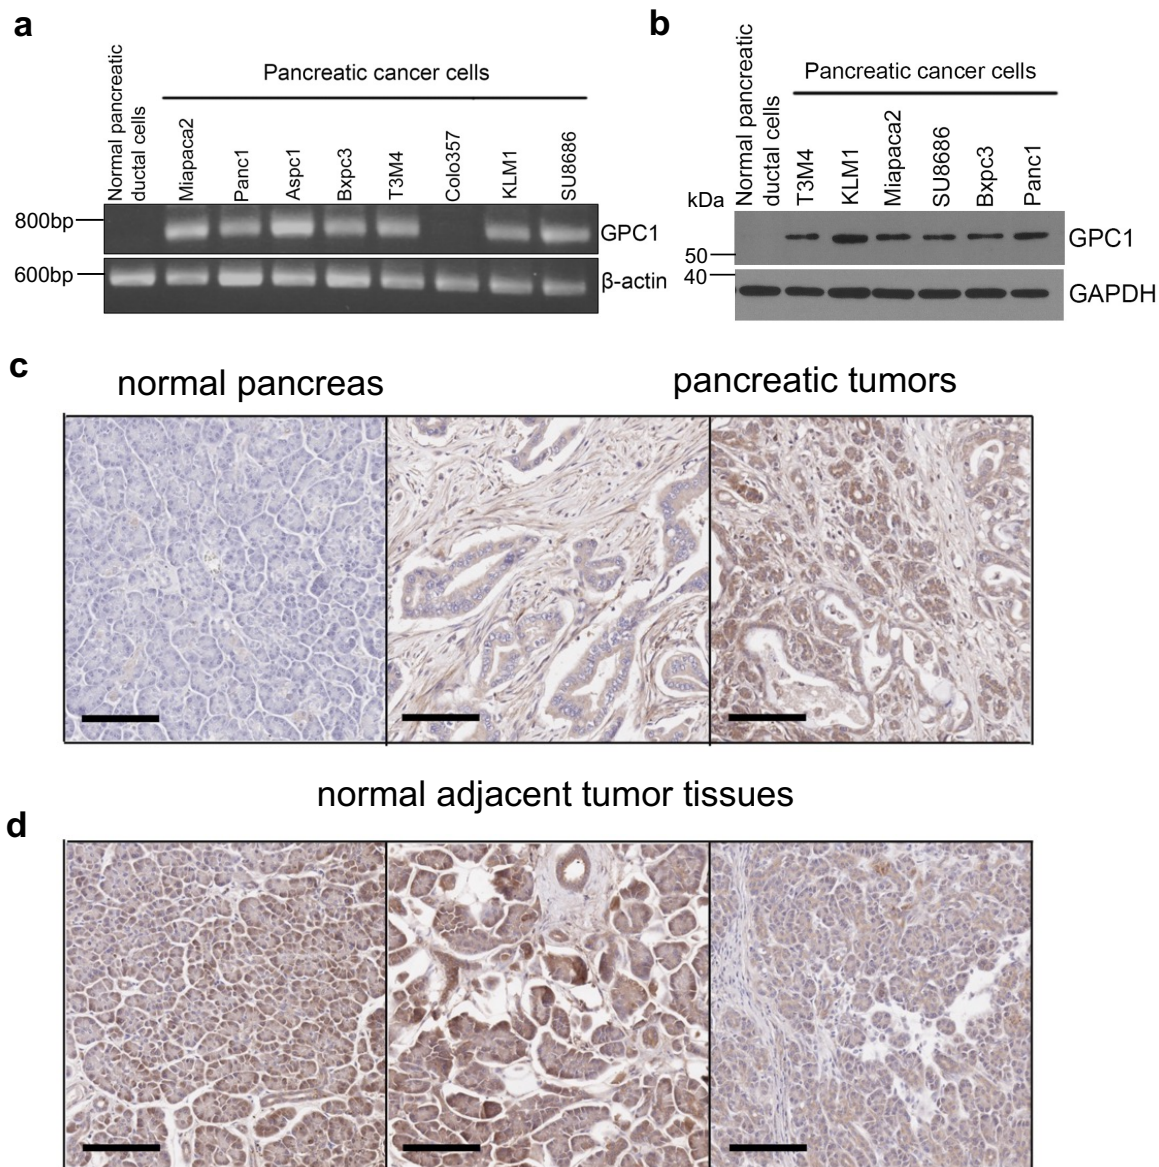

**Supplementary Fig. 3: Increased expression of GPC1 in pancreatic cancer.** **a**, GPC1 mRNA levels are increased in a majority of pancreatic cancer cell lines including Miapaca-2, Panc-1, Aspc-1, Bxpc3, T3M4, Colo357, KLM1 and SU8686 compared with normal pancreatic duct cell line hTERT-HPNE. The experiment was repeated twice with similar results. **b**, GPC1 protein levels are also elevated in pancreatic cancer cells compared with normal pancreatic duct cell line hTERT-HPNE. HM2 antibody was used to detect GPC1 protein in the western blot. The experiment was repeated twice with similar results. **c**, GPC1 expression is detected in pancreatic tumor tissues at various levels as compared to normal pancreas. These are representative images of Supplementary Fig. 4 including 50 specimens from patients of pancreatic cancer, 6 specimens

of tumor-adjacent normal tissues and 4 normal pancreatic tissues. **d**, GPC1 expression is detected in NATs. 1  $\mu\text{g}/\text{ml}$  of HM2 was used for IHC. Scale bar = 100  $\mu\text{m}$ . Source data are provided as a Source Data file.

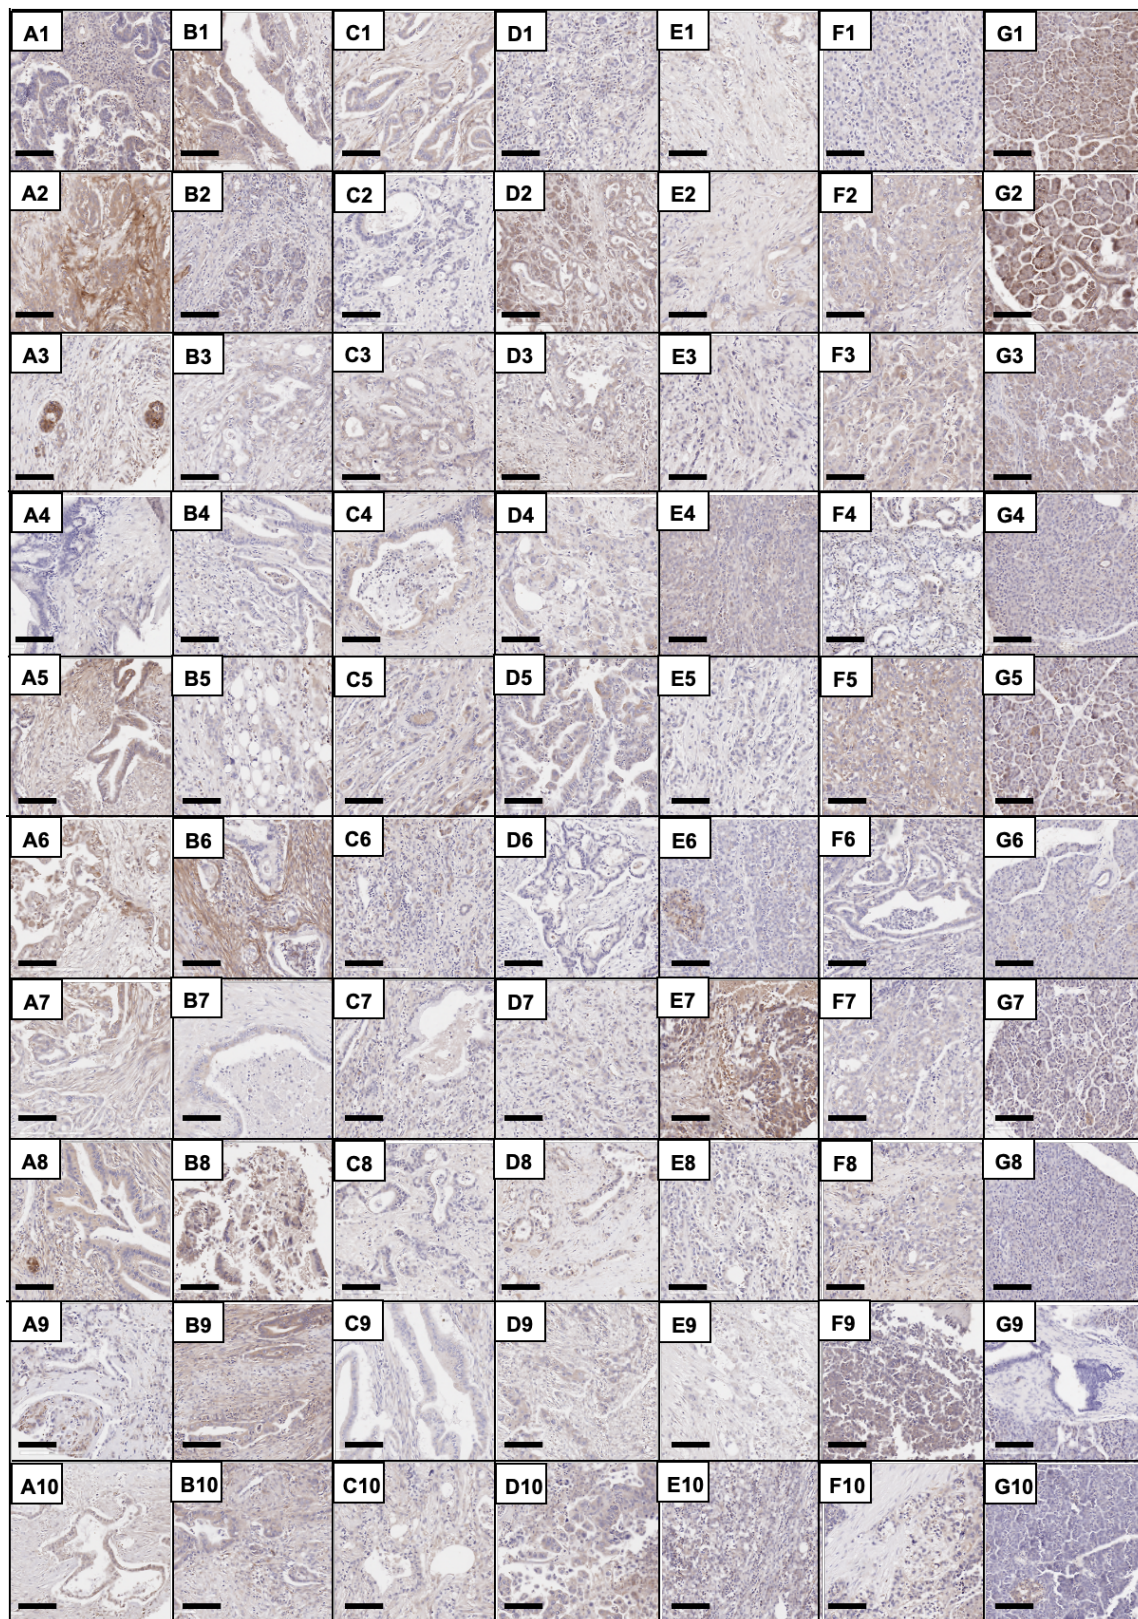

**Supplementary Fig. 4: GPC1 expression as determined by immunohistochemistry.** The staining was performed once. This tissue microarray includes 50 specimens from patients of pancreatic cancer, 6 specimens of tumor-adjacent normal tissues and 4 normal pancreatic tissues. The tissues were labeled with 1  $\mu\text{g/ml}$  HM2 antibody. Images were obtained under 20X magnification. Scale bar = 100  $\mu\text{m}$ .

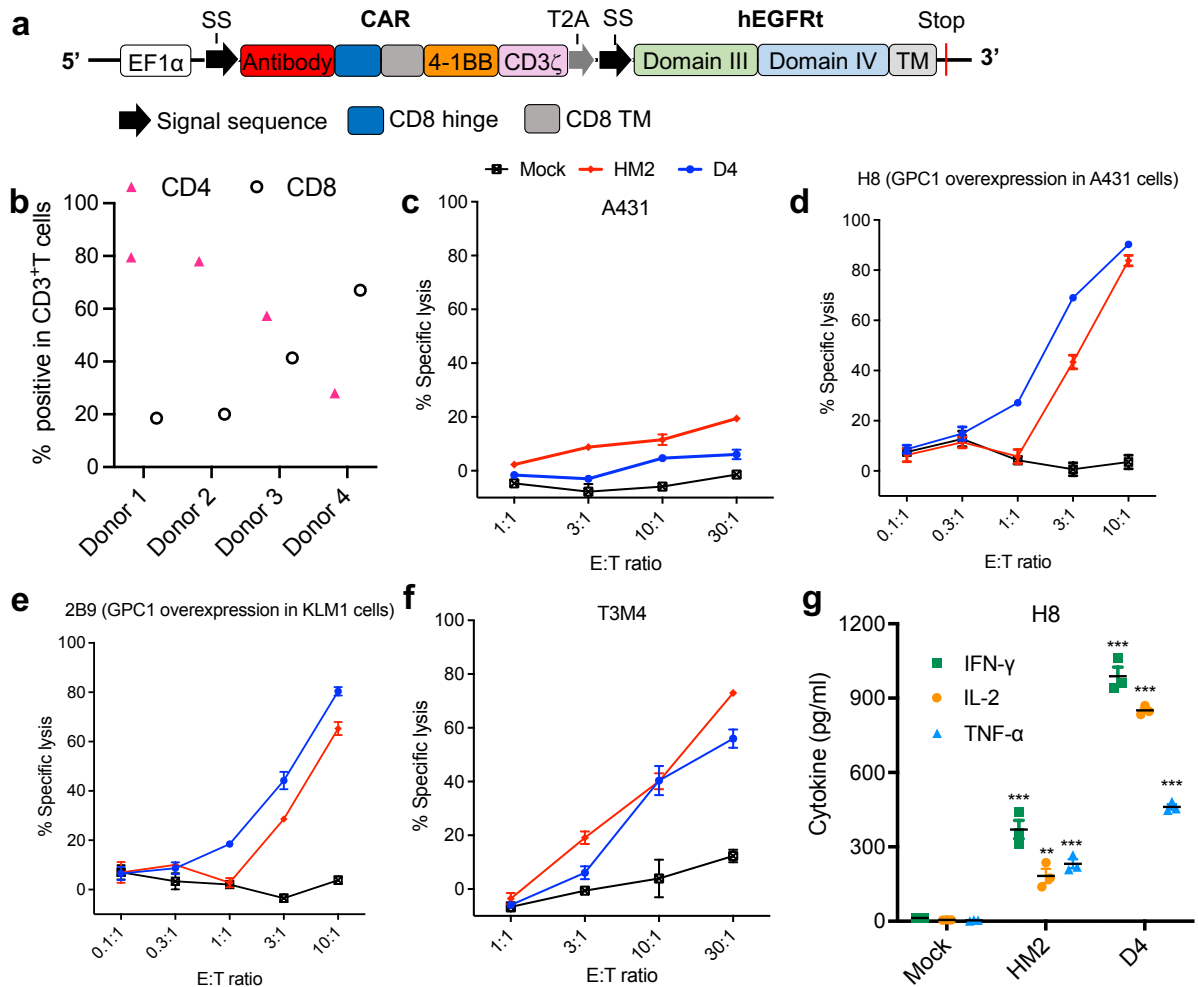

**Supplementary Fig. 5: GPC1-targeted CAR T cells kill GPC1-positive tumor cells *in vitro*.**

**a**, Schematic of the CAR construct. Co-expression of the truncated human epidermal growth factor receptor (hEGFRt) in this bicistronic vector is used for cell tracking and ablation. The hEGFRt lacks the domains essential for ligand binding and tyrosine kinase activity, but it retains the binding epitope of anti-EGFR monoclonal antibody cetuximab. **b**, The percentages of CD4<sup>+</sup> and CD8<sup>+</sup> T cells in T cells derived from four healthy donors. **c-f**, Both HM2 and D4 CAR T cells potently lysed GPC1-positive H8 (**d**), 2B9 (**e**) and T3M4 (**f**) cells without affecting GPC1-negative A431 cells (**c**) after 24 hours of co-culture. **g**, The above culture supernatants from H8 (**d**) and A431 (**c**) at the E:T ratio of 3:1 were harvested to measure IFN- $\gamma$ , IL-2 and TNF- $\alpha$  secretions via ELISA. n = 3 independent experiments for Fig. 5c-g. \*\*  $p < 0.01$ , \*\*\*  $p < 0.001$ , two-tailed unpaired Student's  $t$  test. The CAR T cells used in panel c-g were produced using donor

1's PBMCs. Values represent mean  $\pm$  SEM. Source data and exact p values are provided in the Source data file.

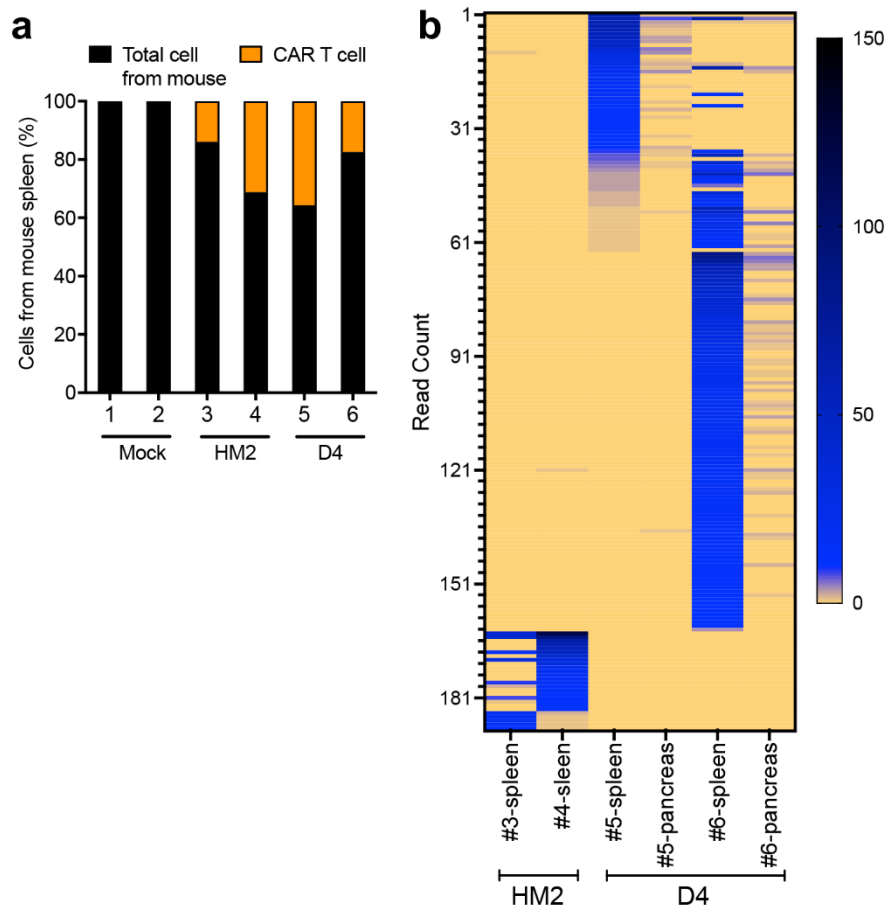

**Supplementary Fig. 6: GPC1-targeted CAR T cells exhibit potent antitumor activity in the 2B9 peritoneal dissemination xenograft mouse model.** **a**, Detection of CAR vector-positive cells in mouse spleen after 5 weeks of treatment. **b**, Distribution of integration sites in mice treated with HM2 and D4 CAR T cells. The integrated genes were largely shared in T cells recovered from different tissues of the same mouse, while some overlap was also observed in different mice receiving treatment. The CAR T cells used in this study were produced using donor 1's PBMCs. Values represent mean  $\pm$  SEM. Source data are provided as a Source Data file.

**a** CD4<sup>+</sup> T cell subpopulation

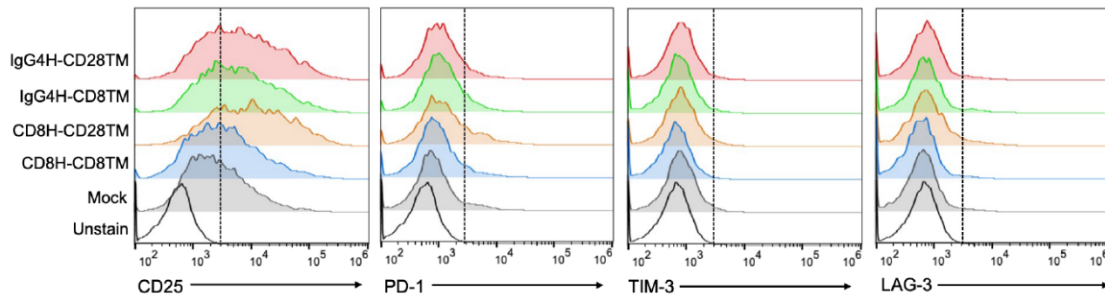

**b** CD8<sup>+</sup> T cell subpopulation

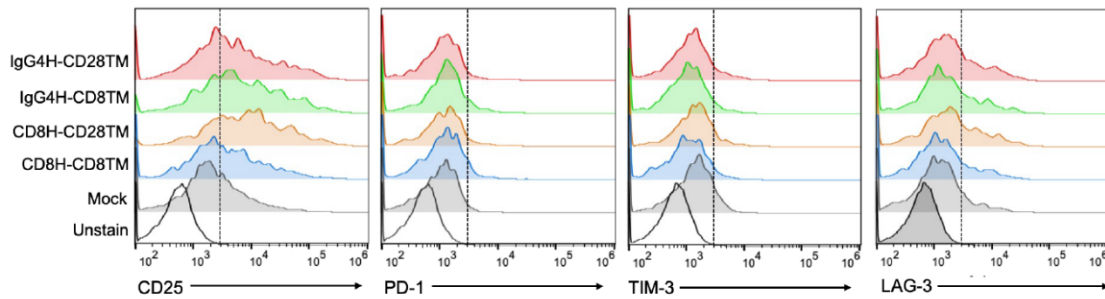

**c** ■ Mock ■ CD8H-CD8TM ■ CD8H-CD28TM ■ IgG4H-CD8TM ■ IgG4H-CD28TM

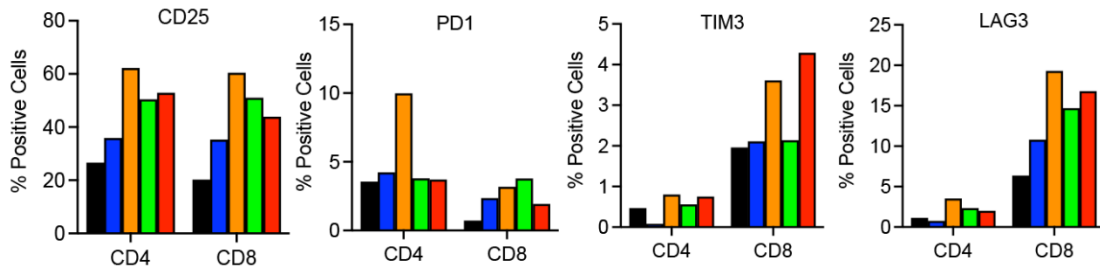

**d**

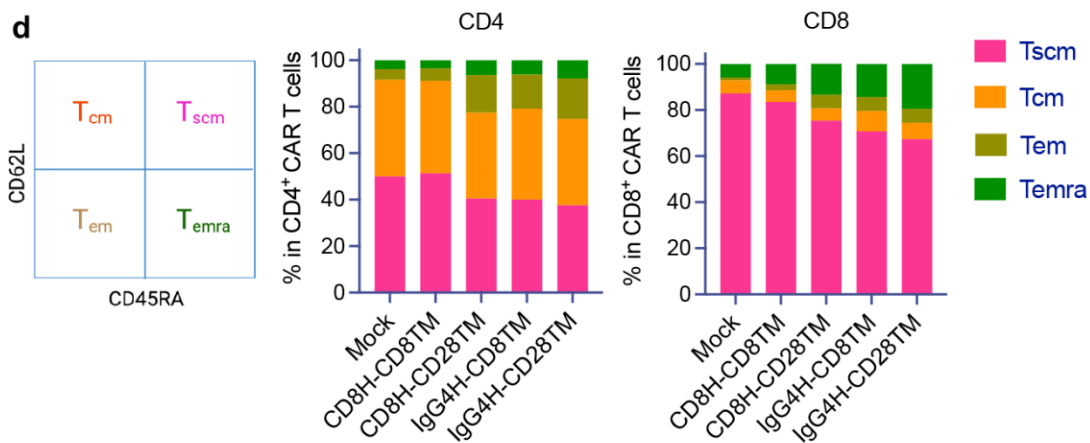

**Supplementary Fig. 7: The tonic signaling of D4 CAR T cells with different hinge and transmembrane domain (TM) on day 8 of *ex vivo* expansion. a-b** Expression of T-cell



activation marker CD25 and exhaustion markers including PD1, TIM3 and LAG3 after initial activation in CD4<sup>+</sup> (**a**) and CD8<sup>+</sup> (**b**) D4 CAR T cell subpopulations. **c**, Percentage of exhaustion markers in CD4<sup>+</sup> (**a**) and CD8<sup>+</sup> (**b**) CAR T cell populations based on **a** and **b**. **d**, Memory T cell phenotypes of D4 CAR T cells with different hinge and TM. Relative proportion of stem cell-like memory (Tscm), central memory (Tcm), effector memory (Tem), and terminally differentiated effector memory (Temra) phenotypes are defined by CD62L, CD45RA and CD95 expression. All experiments in this figure were performed once. The CAR T cells used in this study were produced using donor 2's PBMCs. Source data are provided as a Source Data file.

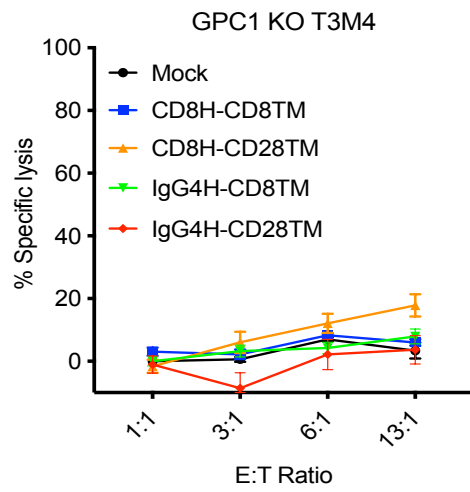

**Supplementary Fig. 8: Minimal lysis of GPC1 KO T3M4 cells by any of the D4 CAR T cells.** The CAR T cells used in this study were produced using donor 2's PBMCs. n = 3 independent experiments. Values represent mean  $\pm$  SEM. Source data are provided as a Source Data file.

● T3M4 ● GPC1 KO T3M4

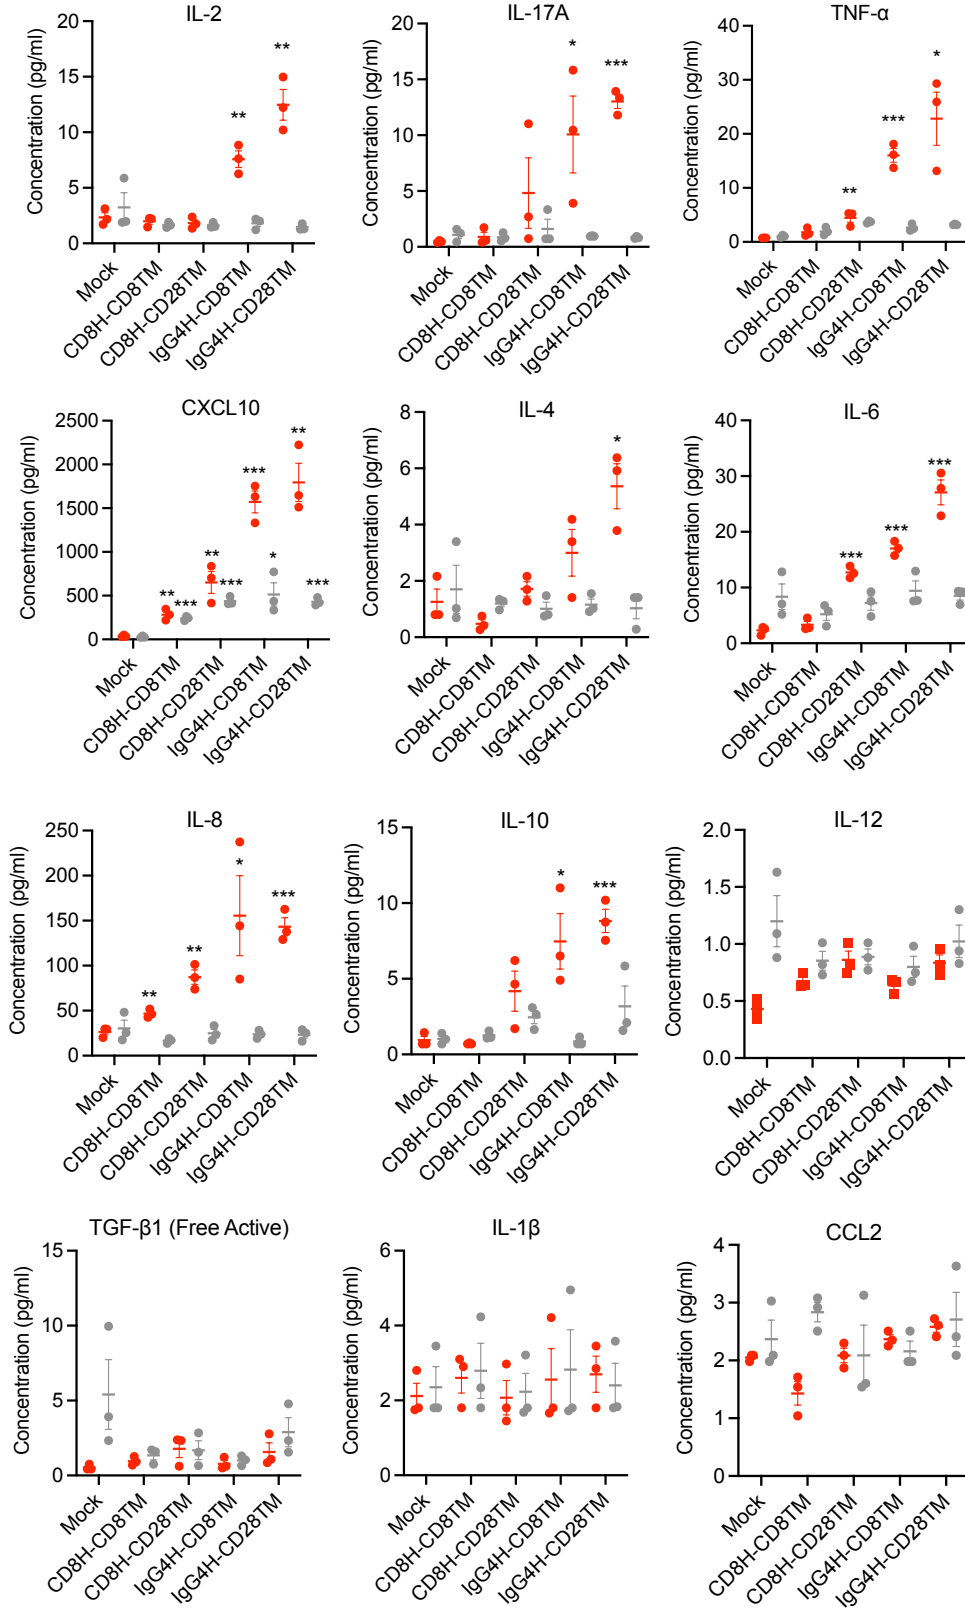

**Supplementary Fig. 9: Secretion of cytokines and chemokines by D4 CAR T cells with different hinge and TM upon stimulation by GPC1-positive T3M4 and GPC1 KO-T3M4 cells.**

The CAR T cells used in this study were produced using donor 2's PBMCs. n = 3 independent experiments. \* $p < 0.05$ , \*\* $p < 0.01$ , \*\*\* $p < 0.001$ , two-tailed unpaired Student's  $t$  test. Values represent mean  $\pm$  SEM. Source data and exact p values are provided in the Source data file.

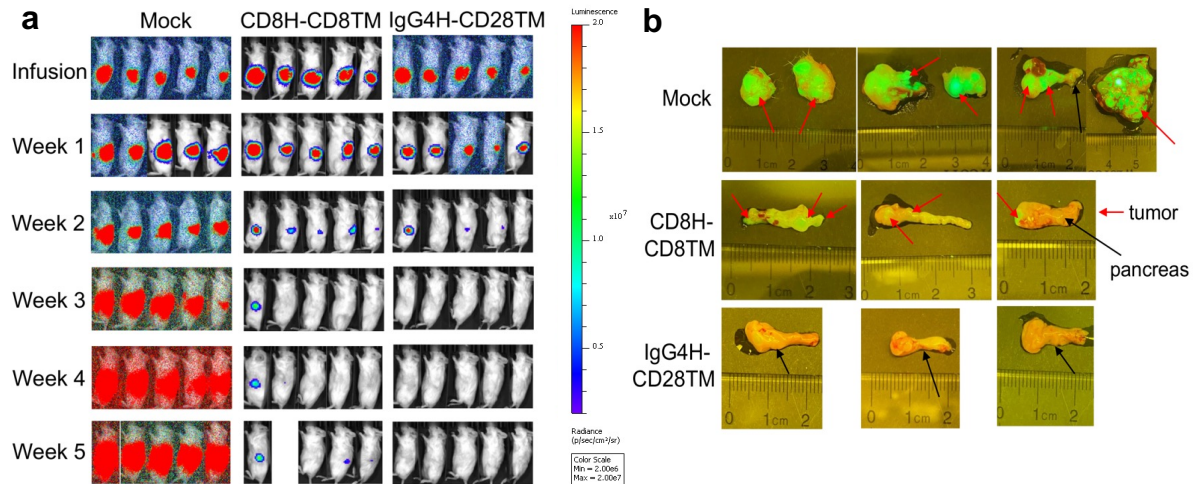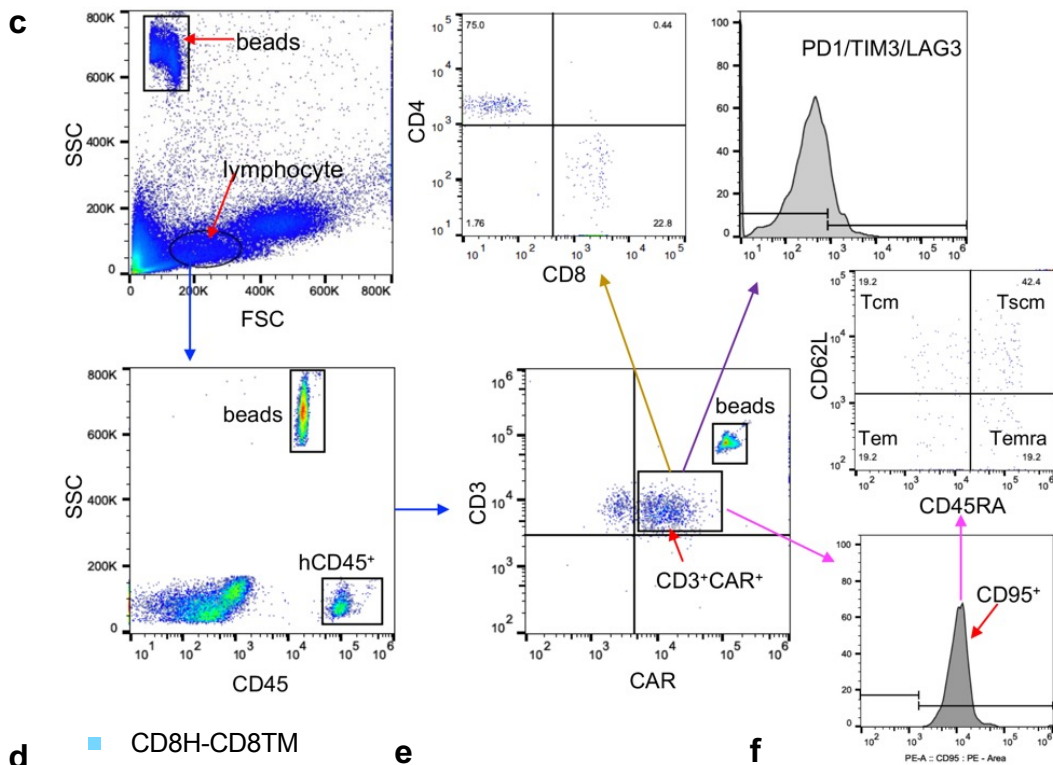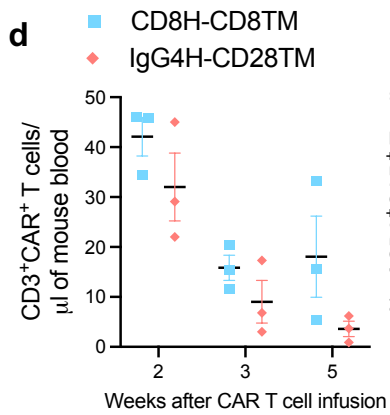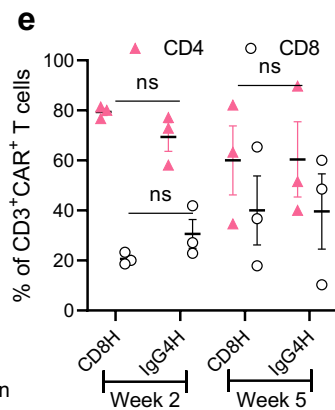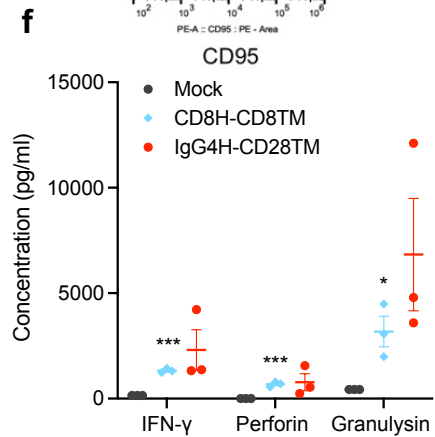

**Supplementary Fig. 10: D4-IgG4H-CD28<sup>TM</sup> CAR T cells demonstrate improved anti-tumor activity in the Panc-1 orthotopic pancreatic xenograft mouse model.** **a**, D4-IgG4H-CD28<sup>TM</sup> CAR T cells demonstrated enhanced antitumor efficacy compared with D4-CD8H-CD8<sup>TM</sup> CAR T cells *in vivo*. n = 5 mice/group. **b**, Representative pictures of mouse pancreas and tumors in each group after dissection. Panc-1 cells were tagged with GFP and luciferase. n = 3 mice/group. **c**, Gating strategies of analyzing human T cell CD4/CD8 ratio, exhaustion and phenotype in mouse peripheral blood. **d**, Quantification of absolute CD3<sup>+</sup>CAR<sup>+</sup> T cell numbers in mouse peripheral blood during the study period. n = 3 mice/group. **e**, The CD4/CD8 ratios of D4-CD8H-CD8<sup>TM</sup> and D4-IgG4H-CD28<sup>TM</sup> CAR T cells in mouse peripheral blood at week 2 and week 5. n = 3 mice/group. ns = p > 0.05, two-tailed unpaired Student's *t* test. **f**, Significantly increased secretions of IFN- $\gamma$ , perforin, and granulysin in the D4-IgG4H-CD28<sup>TM</sup> CAR group were observed compared with the D4-CD8H-CD8<sup>TM</sup> CAR group at week 2 post-infusion. n = 3 mice/group. \**p* = 0.019, \*\*\**p* < 0.001, two-tailed unpaired Student's *t* test. The CAR T cells used in this study were produced using donor 3's PBMCs. Values represent mean  $\pm$  SEM. Source data and exact p values are provided in the Source data file.

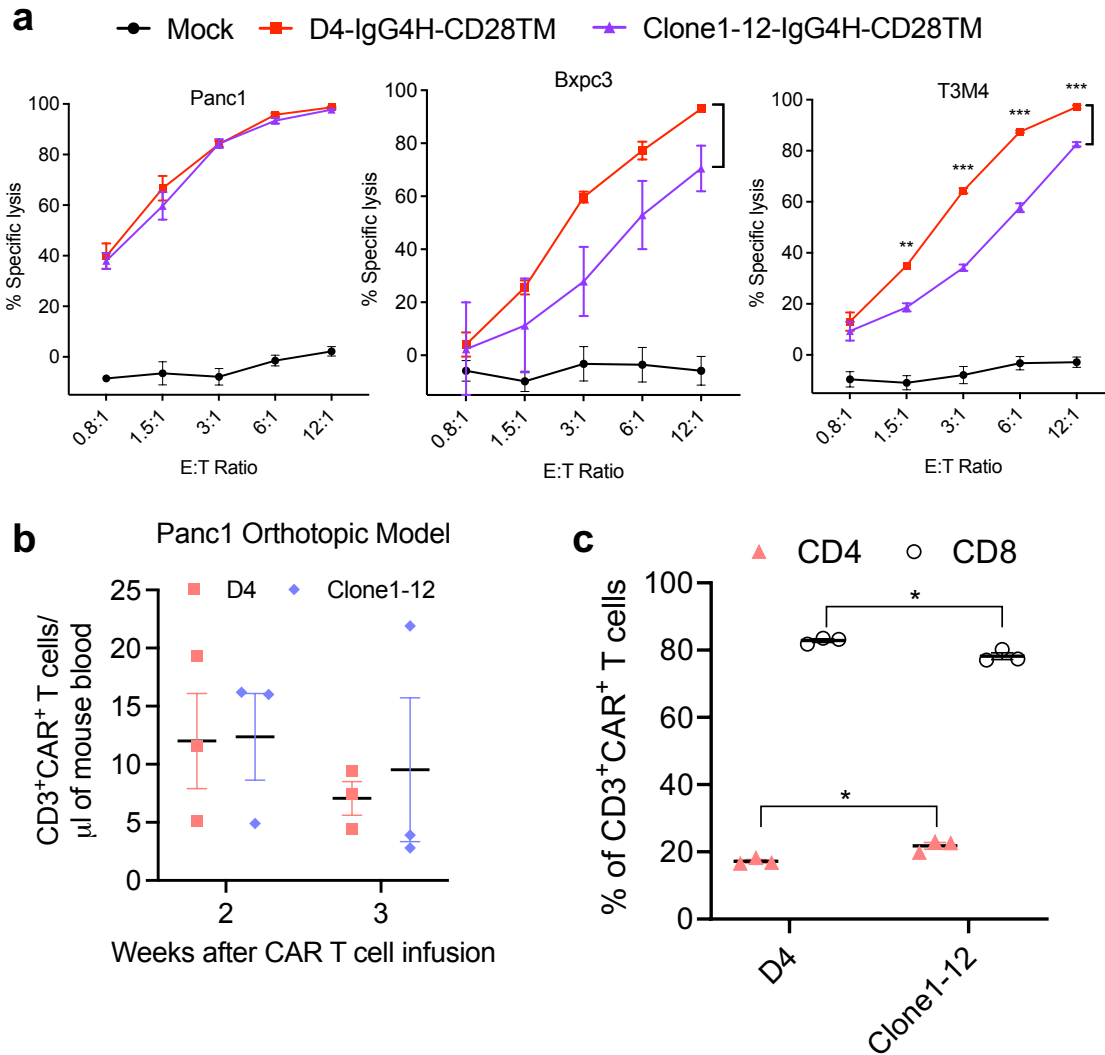

**Supplementary Fig. 11: Comparison of D4-IgG4H-CD28TM and clone 1-12-IgG4H-CD28TM CAR T cells *in vitro* and *in vivo*.** **a**, *in vitro* cytolytic activity of both D4-IgG4H-CD28TM and clone 1-12-IgG4H-CD28TM CAR against Panc-1, Bxpc3 and T3M4 cancer cells.  $n = 3$  independent experiments.  $**p = 0.0013$ ,  $***p < 0.001$ , two-tailed unpaired Student's *t* test. **b**, Quantification of absolute CD3<sup>+</sup>CAR<sup>+</sup>T-cell numbers in mouse peripheral blood from the Panc1 orthotopic xenograft study in Fig. 5d.  $n = 3$  mice/group. **c**, The CD4/CD8 ratios of D4-IgG4H-CD28TM CAR T and clone 1-12-IgG4H-CD28TM CAR T cells in mouse peripheral blood at week 2.  $n = 3$  mice/group.  $*p = 0.015$ , two-tailed unpaired Student's *t* test. The CAR T cells used in this study were produced using donor 4's PBMCs. Values represent mean  $\pm$  SEM. Source data and exact p values are provided in the Source data file.

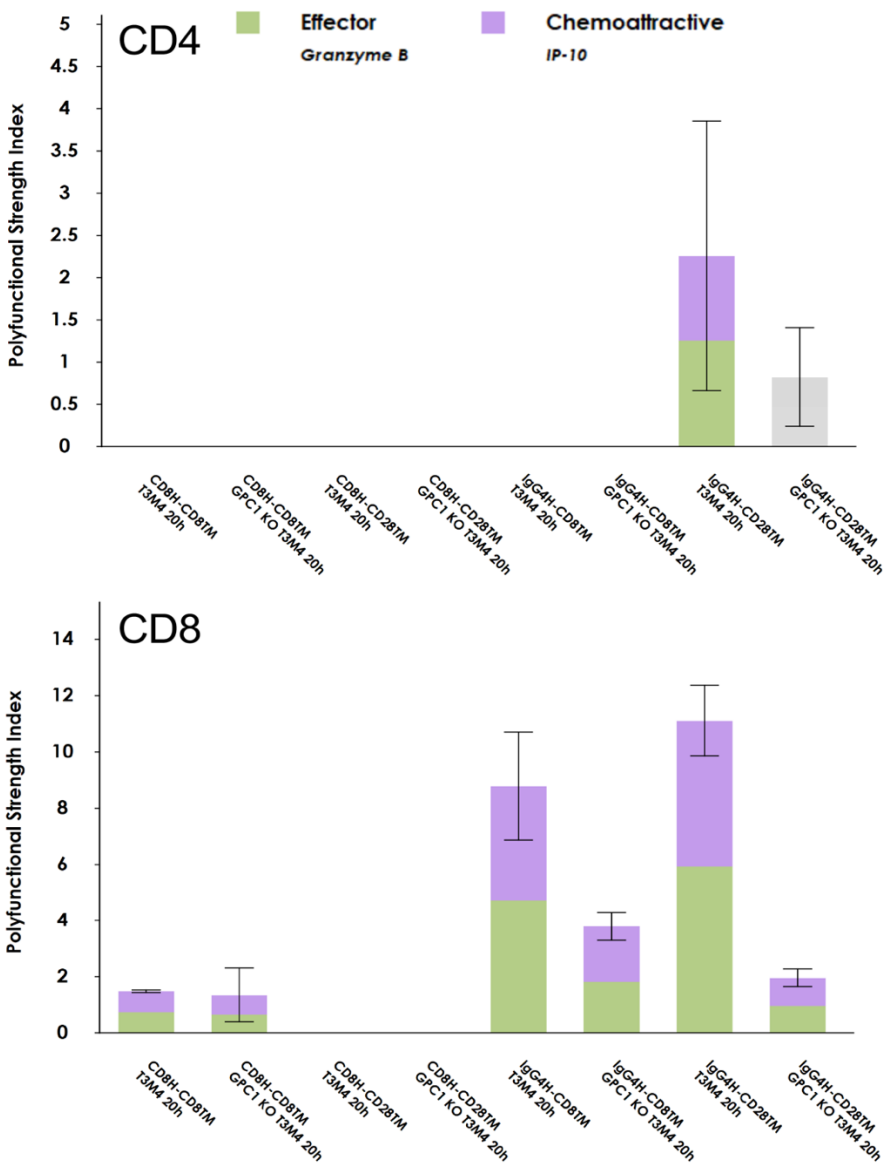

**Supplementary Fig. 12: Polyfunctionality of T cells redirected with GPC1.** PSI computed for various D4 CAR T cells co-cultured with T3M4 or GPC1 KO T3M4 cells for 20 hours at the single-cell level. The grey column represented the insignificant results below the IsoSpeak software threshold, which is less than 2% of single cells in the group. n = 2 independent experiments. Values represent mean  $\pm$  SEM. Source data are provided as a Source Data file.



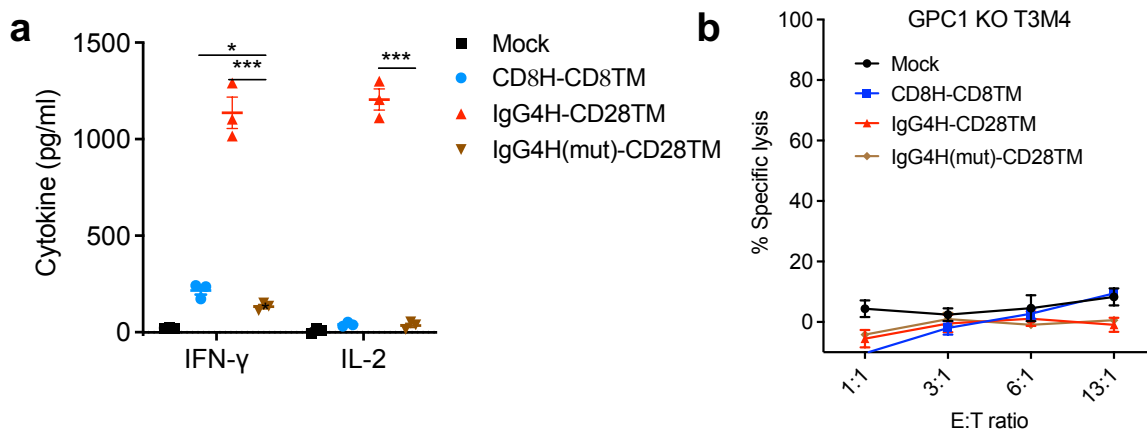

**Supplementary Fig. 13: Dimerization is crucial for the potent activity of D4-IgG4H-CD28<sup>TM</sup> CAR T cells.** **a**, The D4-IgG4 hinge CAR T cells lost the capability to secrete cytokines when both cysteine residues are mutated. **b**, No non-specific killing of various D4 CAR T cells when co-cultured with GPC1 KO T3M4 cells. The CAR T cells used in this study were produced using donor 2's PBMCs.  $n = 3$  independent experiments in Fig. 13.  $*p = 0.027$ ,  $***p < 0.001$ , two-tailed unpaired Student's  $t$  test. Values represent mean  $\pm$  SEM. Source data and exact  $p$  values are provided in the Source data file.

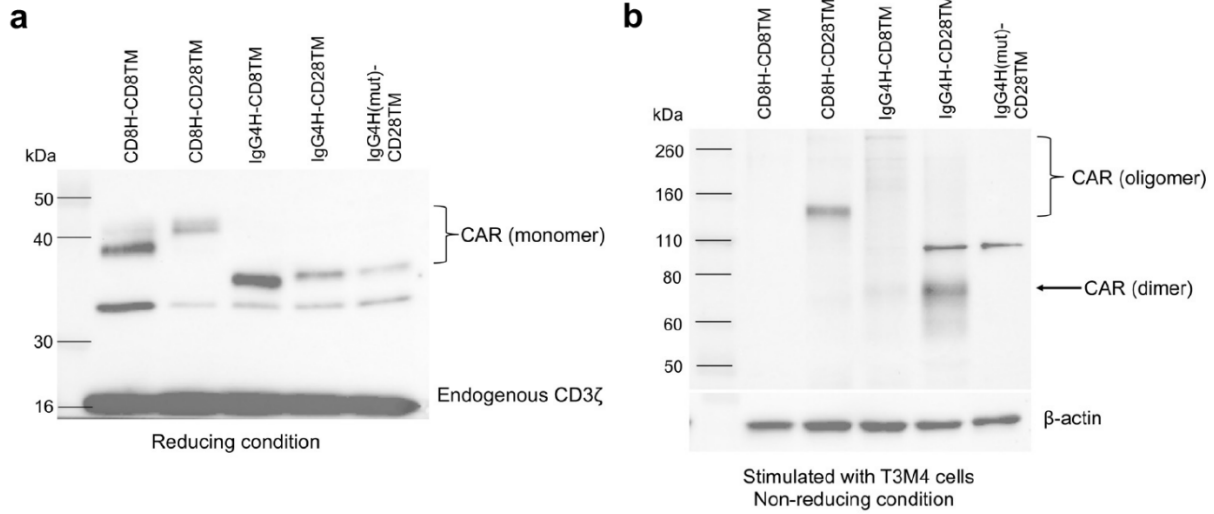

**Supplementary Fig. 14: Dimerization of D4-IgG4H-CD28<sup>TM</sup> CAR after stimulation with T3M4 cells.** **a**, Western blot analysis of CAR expression under reducing condition.  $n = 1$  independent experiment. **b**, Western blot analysis of CAR expression when stimulated with T3M4 cells for 2 hours under non-reducing condition. Membranes were stained with CD3 $\zeta$  antibody.  $n = 1$  independent experiment. The CAR T cells used in this study were produced using donor 2's PBMCs. Source data are provided as a Source Data file.

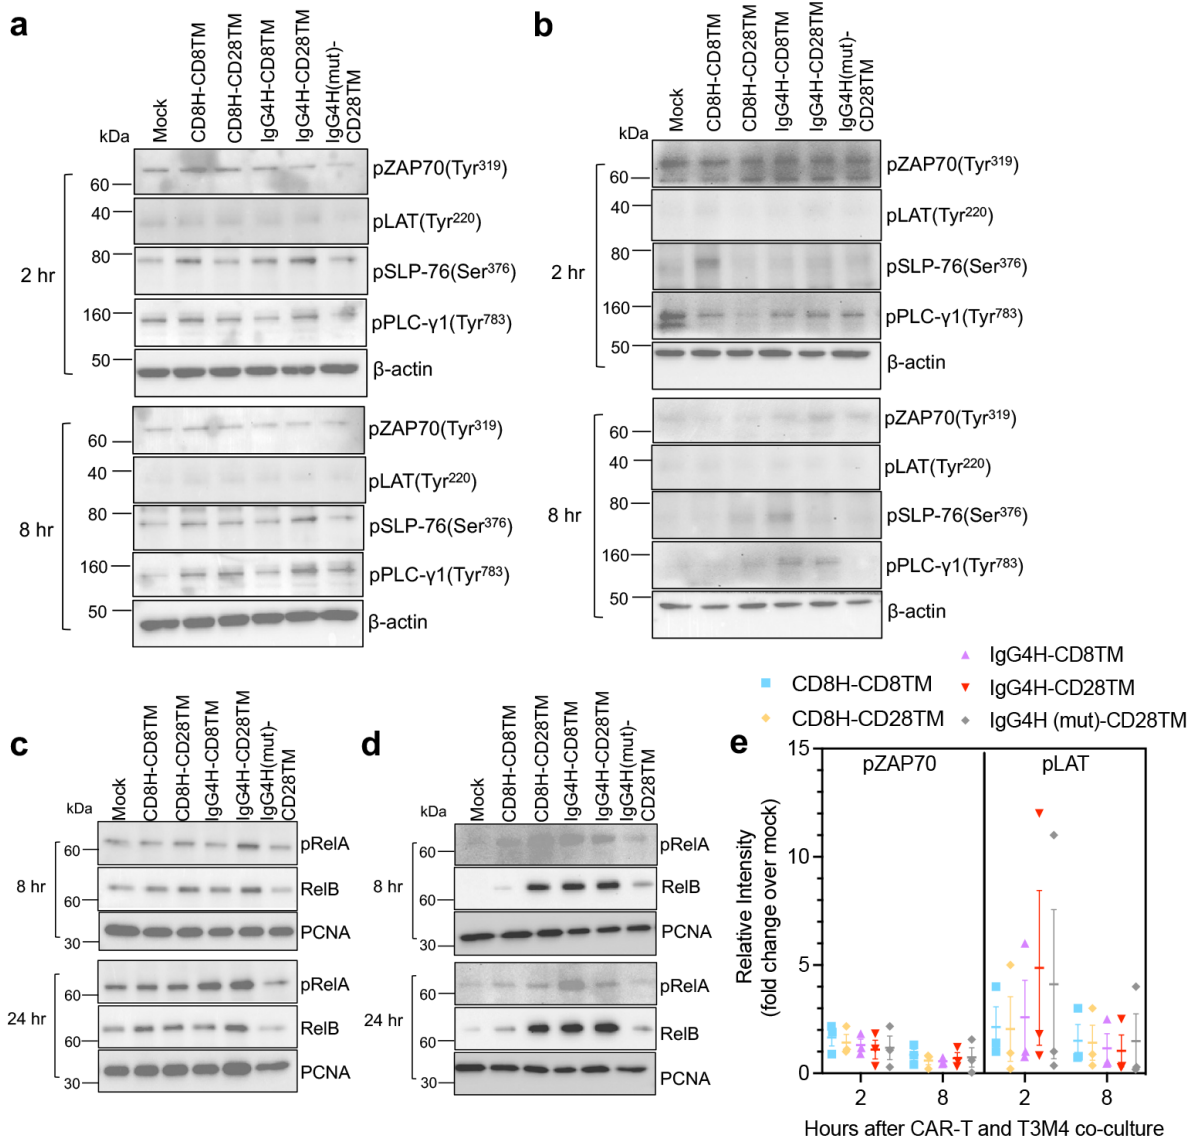

**Supplementary Fig. 15: Western blot analysis of T-cell signaling molecules of various D4 CAR T cells upon stimulation with T3M4 cells. a-b,** Phosphorylation of T-cell signaling molecules in the cytoplasm. Two separate experiments were performed using T cells prepared from two different donors. **c-d,** Nuclear localization of NF- $\kappa$ B signaling transcription factors in the nucleus. Two separate experiments were performed using T cells prepared from two different donors. **e,** The compiled data of **a-d** and **Fig. 7 f-g** were quantified using Image J and normalized with mock control.  $n = 3$  independent experiments. The CAR T cells used in this study were produced using both donor 2's and donor 4's PBMCs. Values represent mean  $\pm$  SEM. Source data are provided as a Source Data file.
